# Supplementary material
Source: PubMed Central journal article supplement (PMC7526700)
Supplement: NIHMS1627652-supplement-Supplemental_Tables_S1-S2.pdf [file NIHMS1627652-supplement-Supplemental_Tables_S1-S2.pdf]

**Supplemental Figure S1. Number of trachelectomy-offering centers per calendar year between 2001-2011.**

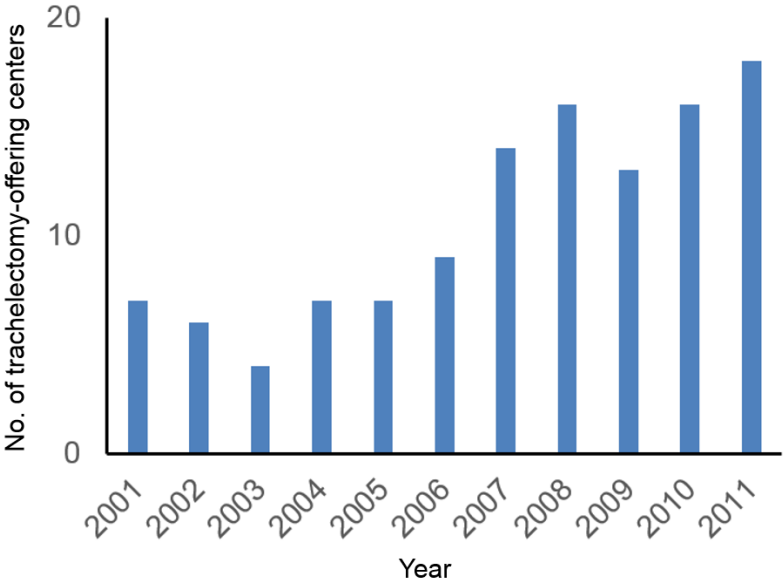

**Supplemental Figure S2. Age-adjusted populational incidence rate of localized cervical cancer among women aged <45 years (2004-2016).**

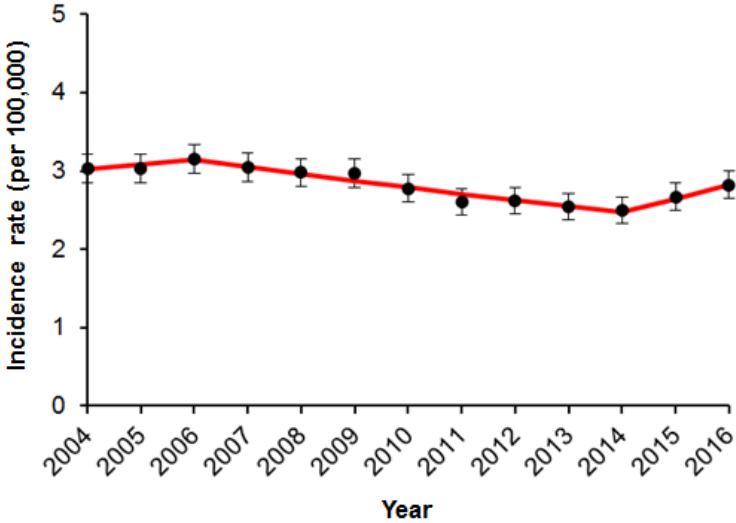

SEER\*Stat 8.3.6 was used to generate the results. Age-adjusted populational incidence rate for localized cervical cancer among women aged <45 years are shown between 2004-2016. Between 2006 and 2014, annual percentage was -3.0 (95% confidence interval -4.0 to -1.9,  $P<0.001$ ). There was no change in the rate for the periods 2004-2006 and 2014-2016.

**Supplemental Table S1. Volume-outcome relation in various oncologic surgeries.**

| Cancer type                                                  | Incidence rank <sup>†</sup> | Author           | Year | Area | No.     | Surgery type | Surgical complication                                   | Oncologic outcome                   |
|--------------------------------------------------------------|-----------------------------|------------------|------|------|---------|--------------|---------------------------------------------------------|-------------------------------------|
| <b>Volume-outcome relationship, observed</b>                 |                             |                  |      |      |         |              |                                                         |                                     |
| Brain                                                        | 16                          | Shinjo [10]      | 2019 | JPN  | 1,354   | TRS          | ↓hospital mortality                                     |                                     |
| Lung                                                         | 2                           | Møller [11]      | 2016 | UK   | 15,738  | Lobec        | ↓1M mortality                                           |                                     |
|                                                              |                             | Schillemans [12] | 2019 | BEL  | 9,817   | Lobec        |                                                         | Improved OS                         |
| Liver                                                        | 13                          | Hollenbeck [13]  | 2006 | USA  | 3,630   | Hepatec      | ↓surgical mortality                                     |                                     |
|                                                              |                             | Chapman [14]     | 2017 | USA  | 12,757  | Hepatec      |                                                         | Improved OS                         |
| Pancreatic                                                   | 11                          | Mackay [15]      | 2019 | NLD* | 4,495   | PD           | ↓hospital mortality                                     |                                     |
| Cervical                                                     | 20                          | Matsuo [16]      | 2019 | USA  | 5,964   | RH           |                                                         | Improved DFS / OS                   |
| Ovarian                                                      | 17                          | Wright [17]      | 2012 | USA  | 36,624  | TRS          | ↓hospital mortality                                     |                                     |
|                                                              |                             | Uppal [18]       | 2018 | USA  | 42,931  | TRS          | ↓1-3M mortality                                         | Improved OS                         |
| Gynecologic                                                  | n/a                         | Matsuo [19]      | 2019 | USA  | 1,912   | Exent        | ↓surgical mortality                                     |                                     |
| <b>Volume-outcome relationship, inconsistent<sup>§</sup></b> |                             |                  |      |      |         |              |                                                         |                                     |
| Esophageal                                                   | 18                          | Rouvelas [20]    | 2007 | SWE  | 1,199   | ER           |                                                         | Improved OS                         |
|                                                              |                             | Kozower [21]     | 2012 | USA  | 6,248   | ER           | No association (hospital mortality)                     |                                     |
| Breast                                                       | 1                           | Chen [22]        | 2009 | TWN  | 13,360  | Resec        |                                                         | Improved OS                         |
|                                                              |                             | Sheckter [23]    | 2019 | USA  | 103,310 | Reconst      | No association (complication)                           |                                     |
| Colon                                                        | 4                           | Schrag [24]      | 2000 | USA  | 27,986  | Colec        |                                                         | Improved OS                         |
|                                                              |                             | Meyerhardt [25]  | 2004 | USA  | 1,330   | Colec        |                                                         | No association (OS, DFS)            |
| Prostate                                                     | 3                           | Begg [26]        | 2002 | USA  | 11,522  | RP           | ↓surgical complication<br>No association (1M mortality) |                                     |
|                                                              |                             | Ellison [27]     | 2005 | USA  | 12,635  | RP           |                                                         | Improved DFS<br>No association (OS) |
| Bladder                                                      | 6                           | Mayer [28]       | 2010 | UK   | 8,596   | RC           | No association (1M mortality)                           |                                     |
|                                                              |                             | Siemens [29]     | 2014 | CAN  | 2,802   | TRS          |                                                         | Improved OS                         |
| Endometrial                                                  | 9                           | Buskwofie [30]   | 2018 | USA  | 324,502 | Hyst         |                                                         | No association (OS)                 |
|                                                              |                             | Wright [31]      | 2018 | USA  | 44,558  | Hyst         | ↓surgical mortality                                     |                                     |

†based on the 2019 incidence statistics per SEER (gender irrespective) \*including Germany. § inconsistency refers variable volume-outcome relationship results across the studies. Abbreviations: colec, colectomy; ER, esophageal resection; hepatic, hepatectomy; hyst, hysterectomy; Reconst, free-flap and prosthetic breast reconstruction; lobec, pulmonary lobectomy; RC, radical cystectomy; RH, radical hysterectomy; RP, radical prostatectomy; Resec, breast resection; TRS, tumor reductive surgery; PD, pancreatoco-duodenectomy; DFS, disease-free survival; OS, overall survival; BEL, Belgium; CAN, Canada; Exent, exenteration; JPN, Japan; NLD, Netherlands; SWE, Sweden; TWN, Taiwan; UK, United Kingdom; USA, United States of America; 1M, 1 month; 3M, 3 months

## Supplemental Table S2. ICD-9 code list.

| ICD-9 Diagnosis Codes                          |                                                                                                                                                                                                               |
|------------------------------------------------|---------------------------------------------------------------------------------------------------------------------------------------------------------------------------------------------------------------|
| Cervical cancer                                | 1800, 1801, 1808, 1809                                                                                                                                                                                        |
| Obesity                                        | 27800                                                                                                                                                                                                         |
| Morbid obesity                                 | 27801                                                                                                                                                                                                         |
| History of radiation                           | V153, V661, E9268, E9269, V671                                                                                                                                                                                |
| History of chemotherapy                        | V5811, V662, V672, V8741                                                                                                                                                                                      |
| History of other malignancy                    | See codes for CC14                                                                                                                                                                                            |
| Metastatic disease                             | See codes for CC16                                                                                                                                                                                            |
| Perioperative complications                    |                                                                                                                                                                                                               |
| Position-dependent complications               |                                                                                                                                                                                                               |
| Fluid overload                                 | 27669                                                                                                                                                                                                         |
| Laryngeal edema                                | 47825, 4786                                                                                                                                                                                                   |
| Air embolism                                   | 9991, 9580                                                                                                                                                                                                    |
| Cerebral edema                                 | 3485                                                                                                                                                                                                          |
| Pulmonary edema                                | 5184                                                                                                                                                                                                          |
| Respiratory failure                            | 5185, 5188, 99739                                                                                                                                                                                             |
| Requirement for prolonged ventilation          | 9671, 9672                                                                                                                                                                                                    |
| Aspiration                                     | 77085, 77086, 99732                                                                                                                                                                                           |
| Atelectasis                                    | 7704, 7705                                                                                                                                                                                                    |
| Peripheral nerve injury                        | 953, 954, 955, 956, 957, 9970<br>36100, 36101, 36102, 36103, 36104, 36105, 3612, 3613,<br>36283, 3700, 3713, 37140, 37142, 37170, 3712, 37250,<br>37271, 37272, 37273, 37289, 3729, 9180, 9181, 9182,<br>9189 |
| Ocular injury                                  |                                                                                                                                                                                                               |
| Cardiac arrhythmia, arrest, or failure         | 427, 428, 429                                                                                                                                                                                                 |
| Compartment syndrome                           | 9589, 7297                                                                                                                                                                                                    |
| Rhabdomyolysis                                 | 72888                                                                                                                                                                                                         |
| Bladder injury                                 | 8670, 8671                                                                                                                                                                                                    |
| Ureteral injury                                | 8672, 8673                                                                                                                                                                                                    |
| Intestinal injury                              | 8632, 8633, 8634, 8635, 8628                                                                                                                                                                                  |
| Vascular injury                                | 9020, 9021, 9022, 9023, 9024, 9025, 9028, 9029, 9049                                                                                                                                                          |
| Postoperative hemorrhage                       | 99811, 9582, 2851                                                                                                                                                                                             |
| Postoperative shock                            | 9980, 9954                                                                                                                                                                                                    |
| Wound complications                            | 9583, 99812, 99813, 9983, 9985, 99883                                                                                                                                                                         |
| Venous Thromboembolism/Pulmonary Embolism      | 452, 453, 4151, 4162                                                                                                                                                                                          |
| Cerebrovascular Accident                       | 4329, 433, 434, 435, 436, 437                                                                                                                                                                                 |
| Myocardial Infarction                          | 410                                                                                                                                                                                                           |
| Pneumonia                                      | 480, 481, 482, 483, 484, 485, 486, 99731, 99732                                                                                                                                                               |
| Systemic Inflammatory Response Syndrome/Sepsis | 9959                                                                                                                                                                                                          |
| Ileus/Small Bowel Obstruction                  | 5601, 5603, 5608, 5609                                                                                                                                                                                        |
| Intestinal perforation                         | 56983                                                                                                                                                                                                         |
| AKI                                            | 584                                                                                                                                                                                                           |
| Pyelonephritis                                 | 590                                                                                                                                                                                                           |
| Coagulopathy                                   | 79092, 2867, 28659, 2866, 2867, 2869                                                                                                                                                                          |
| Electrolyte imbalance                          | 276                                                                                                                                                                                                           |
| Intraabdominal abscess                         | 56722, 56731, 56738, 5695                                                                                                                                                                                     |
| Charlson Comorbidity Index                     |                                                                                                                                                                                                               |
| CC1: Myocardial Infarction                     | 410, 411, 412                                                                                                                                                                                                 |
| CC2: Congestive Heart Failure                  | 39891, 40201, 40211, 40291, 40401, 40403, 40411,<br>40413, 40491, 40493, 4254, 4255, 4357, 4258, 4259, 428                                                                                                    |
| CC3: Peripheral Vascular Disease               | 0930, 4373, 440, 441, 442, 443, 444, 445, 446, 447, 448,<br>449, 451, 452, 453, 454, 455, 456                                                                                                                 |
| CC4: Cerebrovascular Disease                   | 3623, 430, 431, 432, 433, 434, 435, 436, 437, 438                                                                                                                                                             |
| CC5: Dementia                                  | 290, 294, 331                                                                                                                                                                                                 |

|                                        |                                                                                                                                                                                                                                                                                                            |
|----------------------------------------|------------------------------------------------------------------------------------------------------------------------------------------------------------------------------------------------------------------------------------------------------------------------------------------------------------|
| CC6: Chronic Pulmonary Disease         | 415, 416, 490, 491, 492, 493, 494, 495, 496, 500, 501, 502, 503, 504, 505, 506, 507, 508, 510, 511, 512, 513, 514, 515, 516, 517, 518, 519                                                                                                                                                                 |
| CC7: Connective Tissue Disease         | 710, 711, 712, 713, 714, 715, 716                                                                                                                                                                                                                                                                          |
| CC8: Peptic Ulcer Disease              | 531, 532, 533, 534, 535                                                                                                                                                                                                                                                                                    |
| CC9: Mild Liver Disease                | 0701, 0703, 0705, 07070, 0709, 5710, 5713, 5714, 5716, 5718, 5719, 5731, 5732, 5733, 5738, 5739                                                                                                                                                                                                            |
| CC10: Diabetes without complications   | 2490, 2500                                                                                                                                                                                                                                                                                                 |
| CC11: Diabetes with complications      | 2491, 2492, 2493, 2494, 2495, 2496, 2497, 2498, 2499, 2501, 2502, 2503, 2504, 2505, 2506, 2507, 2508, 2509                                                                                                                                                                                                 |
| CC12: Paraplegia and hemiplegia        | 3341, 342, 343, 344                                                                                                                                                                                                                                                                                        |
| CC13: Renal disease                    | 403, 404, 580, 581, 582, 583, 584, 585, 586, 587, 588, 589, 590, 591, 592, 593                                                                                                                                                                                                                             |
| CC14: Cancer                           | 140, 141, 142, 143, 144, 145, 146, 147, 148, 149, 150, 151, 152, 153, 154, 155, 156, 157, 158, 159, 160, 161, 162, 163, 164, 165, 170, 171, 172, 173, 174, 175, 176, 179, 180, 181, 182, 183, 184, 185, 186, 187, 188, 189, 190, 191, 192, 193, 194, 195, 200, 201, 202, 203, 204, 205, 206, 207, 208, 209 |
| CC15: Moderate or Severe Liver Disease | 4560, 4561, 4562, 570, 5711, 5712, 5715, 572, 5730, 5734, 5735, V427, 99682                                                                                                                                                                                                                                |
| CC16: Metastatic Carcinoma             | 196, 197, 198, 199                                                                                                                                                                                                                                                                                         |
| CC17: HIV/AIDS                         | 042, 07953, 79571, V08                                                                                                                                                                                                                                                                                     |

---
